# Supplementary material for: Dose to organs in the supraclavicular region when covering the Internal Mammary Nodes (IMNs) in breast cancer patients: A comparison of Volumetric Modulated Arc Therapy (VMAT) versus 3D and VMAT
Source: PLoS One. 2018 Oct 19;13(10):e0205770. doi: 10.1371/journal.pone.0205770 (PMC6195271; doi:10.1371/journal.pone.0205770)
Supplement: S1 Data — VMAT VERSUS VMAT+3D. (XLSX) [file pone.0205770.s001.xlsx]

## Sheet: VMAT VERSUS VMAT+3D FOR OARS
Patient	cord max, vmat	cord max, vmat+3d		brachial plexus max, vmat	brachial plexus max, vmat+3d			thyroid mean, vmat	thyroid mean, vmat+3d			esoph max, vmat	esoph max, vmat+3d			esoph mean, vmat	esoph mean, vmat+3d			heart mean, vmat	heart mean, vmat+3d				ipsilung mean, vmat	ipsilung mean, vmat+3d						total lung mean, vmat	total lung mean, vmat+3d			total lung v20 vmat	total lung v20 vmat+3d			cont lung mean, vmat	cont lung mean, vmat+3d			contbreast mean, vmat	contbreast mean, vmat+3d			larynx mean, vmat	larynx mean, vmat+3d
A	30.6	5.7		60.5	58.9			39	21.8			41.7	18.88			5.8	3.72			2.4	2.3				14.8	15.69						9.67	10.03			14.2	15.45			2.4	2			3.7	3.2			21.6	1.72
C	31.7	8.47		59.59	57.27			37	22.8			47.5	13.44			6.65	4.31			3.1	3				14.88	15.66						9.77	10.06			13.4	14.34			3.13	2.4			3.62	3.49			11.88	1.66
J	26.93	13.2		51.22	53.85			26.86	25.02			31.6	36.85			7.9	6.07			3.6	3.52				16.1	16.5						10.93	11.1			16.13	17.09			2.86	2.65			3.59	3.59			19.19	2.01
I	20.68	14.16		50.37	46.42			21.84	9.49			36.58	17.8			9.41	7.44			3.53	3.85				14.71	14.74						9.28	9.3			12.96	12.96			2.75	2.75			4.58	4.53			18.9	3.64
E	33.43	25.4		57.5	55.5			42.75	2.26			53.59	17.78			10.91	7.67			7.55	7.48				15.43	15.31						11.1	10.9			15.49	15.3			3.99	3.64			3.32	3.25			3.71	0.4
B	18.45	10.78		60.5	59.67			19.02	2.87			50.6	50.9			10.22	8.4			5.62	5.51				14.66	15.88						8.73	9.25			12.4	14			2.9	2.72			3.89	3.81			12.85	1
H	34.5	10.6		55.8	51.6			22.8	10.2			47.9	22.1			10.3	5.7			17.7	7.7				13.9	17.4						9.8	10.8			9.4	13.7			6.4	5.3			5.4	5.4			7	1.2
G	21.6	6.8		54.5	50.1			18.2	2.3			41	39.6			7.4	5.9			6.4	6.5				16.3	16.7						9.4	9.4			12.8	13.7			3.3	2.8			4.9	4.9			10.2	1.4
E	28.7	8.5		58	58			35.8	23.1			48.7	11.1			11.1	5.8			6.7	6.3				16.2	20						9.3	10.9			11.9	16.5			3.9	3.9			3.9	3.9			25.4	11.1
D	33.4	21		56.2	61			37.4	16.6			51.3	44			10.8	8.1			8.7	8.7				15.7	16.1						9.6	9.8			11.9	12.4			4.3	4.3			4.9	4.5			12	1.7
MEAN	27.999	12.461		56.418	55.231			30.067	13.644			45.047	27.245			9.049	6.311			6.53	5.486				15.268	16.398						9.758	10.154			13.058	14.544			3.593	3.246			4.18	4.057			14.273	2.583
STDEV	1.8521	1.99842		1.12924	1.48098			2.92309	2.94656			2.23734	4.48661			0.619944	0.483588			1.4687	0.635353				0.263472	0.491389						0.245067	0.238501			0.631021	0.439616			0.379592	0.316692			0.22089	0.243083			2.26749	1.0373
SIGNIFICANCE	p = 0.004			0.08				0.004				0.03				0.004				0.2					0.01							0.04				0.02				0.02				0.06				0.004
RESULT																																																<0.01
																		Patient		heart V25, vmat	heart V25, vmat+3d			Patient	ipsilung V20, vmat	ipsilung V20, vmat+3d				Patient		total lung V10, vmat	total lung V10, vmat+3d							cont lung V10, vmat	cont lung V10, vmat+3d
																		A		0	0			A	24.1	26.3				A		25.7	24.8		p-=0.77					4.7	0		p=0.05
																		C		0	0			C	23.71	25.5				C		27.8	25.3							6.7	0
																		J		0	0			J	26.42	28.1				J		31.3	32.7							1.4	1.3
																		I		0	0			I	23.66	23.66				I		23.5	25							0	0
																		E		1.14	1.1			E	24.73	24.49				E		31.2	30.2							1.8	1.2
																		B		1.7	1			B	24.97	28.17				B		20.7	22.4							1.7	0.6
																		H		0	0			H	19.4	30				H		30.5	29.4							18.6	10.7
																		G		1.5	1.3			G	27.1	28.4				G		27	26.2							2.3	1.2
																		E		0	0			E	27	37				E		23	27.2							4	4.7
																		D		2.2	2.8			D	25.5	26.6				D		28.3	28.1							7.2	7.7
																				0.654	0.62				24.659	27.822						26.9	27.13							4.84	2.74
																				0.278935	0.296198				0.70881	1.18855						1.15585	0.960908							1.69936	1.18192
																		Patient		heart V15, vmat	heart V15, vmat+3d			Patient	ipsilung V10, vmat	ipsilung V10, vmat+3d				Patient		total lung V5, vmat	total lung V5, vmat+3d							cont lung V5, vmat	cont lung V5, vmat+3d
																		A		0	0			A	40.7	42				A		58.2	48.7							24.6	4.5		p=0.04
																		C		0	0			C	44	44.2				C		60	46.1							39.4	9.7
																		J		0	0			J	52.2	52.4				J		61.2	60							14	12.1
																		I		0	0			I	42.5	45.2				I		47.4	51.7							9	11.3
																		E		8.1	7.9			E	49.1	47.8				E		58.7	57.4							22.7	18.9
																		B		4.1	4.4			B	40	44.3				B		45.3	38.3							27.1	6.9
																		H		5.3	5.5			H	45	52				H		69.7	64.1							45.8	36.7
																		G		5.6	5			G	55.3	54.5				G		48	51.4							15.8	11.2
																		E		3.1	2.5			E	47.7	56.5				E		49	48.5							20	19.7
																		D		13.5	13.7			D	52.2	52.9				D		57.7	58.6							25.3	27.6
																				3.97	3.9				46.87	49.18						55.52	52.48							24.37	15.86
																				1.39889	1.40973				1.66547	1.60539						2.46057	2.41963							3.54749	3.16235
																									p=0.07
																																p=0.16
																		Patient		heart V5, vmat	heart V5, vmat+3d			Patient	ipsilung V5, vmat	ipsilung V5, vmat+3d
																		A		3.2	3.8			A	82.3	79.7
																		C		7	10.9			C	74.7	74.4
																		J		18.5	17.3			J	91	91
																		I		17.2	23.7			I	79.1	85.3
																		E		65	63.7			E	80.5	80.8
																		B		21.5	35.5			B	65.7	70.5
																		H		80	81.8			H	97.5	97.7
																		G		49.1	45			G	92.6	89
																		E		58.1	52.5			E	85.4	85
																		D		70.3	67.9			D	94.5	95.3
																				38.99	40.21				84.33	84.87
																				9.01289	8.31774				3.12136	2.76414
																				p=0.85					p=0.75

## Sheet: VMAT VERSUS VMAT+3D FOR PTV
Last name		First name		PTV				PTV			PTV				IMN
				D95				V95			D05				D95
VMAT		PATIENT A	RT	95	VMAT			95	VMAT		108	VMAT			97.9	VMAT
				95	VMAT+3D			95	VMAT+3D		110	VMAT+3D			96.4	VMAT+3D
VMAT		PATIENT C	RT	96.2	VMAT			95.7	VMAT		107	VMAT			97.6	VMAT
				96	VMAT+3D			95	VMAT+3D		108	VMAT+3D			97.2	VMAT+3D
VMAT		PATIENT J	RT	99	VMAT			98.3	VMAT		115	VMAT			94.3	VMAT
				97	VMAT+3D			97.5	VMAT+3D		115	VMAT+3D			95.5	VMAT+3D
VMAT		PATIENT I	RT	95	VMAT			95	VMAT		116	VMAT			100.7	VMAT
				98	VMAT+3D			97.5	VMAT+3D		116	VMAT+3D			102.5	VMAT+3D
VMAT		PATIENT E	RT	95.8	VMAT			95	VMAT		116.8	VMAT			102	VMAT
				95	VMAT+3D			95	VMAT+3D		115	VMAT+3D			100	VMAT+3D
VMAT		PATIENT B	LT	95.1	VMAT			93.3	VMAT		109.7	VMAT			99.9	VMAT
				95	VMAT+3D			95	VMAT+3D		110	VMAT+3D			96.2	VMAT+3D
VMAT		PATIENT H	LT	99	VMAT			97.9	VMAT		114.3	VMAT			92.8	VMAT
				97.8	VMAT+3D			97.1	VMAT+3D		114.7	VMAT+3D			92.3	VMAT+3D
VMAT		PATIENT G	LT	100	VMAT			100	VMAT		117.7	VMAT			95	VMAT
				96	VMAT+3D			96.2	VMAT+3D		115.8	VMAT+3D			94.7	VMAT+3D
VMAT		PATIENT F	LT	98	VMAT			96.3	VMAT		115	VMAT			105	VMAT
				97	VMAT+3D			97	VMAT+3D		115	VMAT+3D			97	VMAT+3D
VMAT		PATIENT D	LT	97.1	VMAT			96.3	VMAT		112.9	VMAT			92.8	VMAT
				97	VMAT+3D			96	VMAT+3D		113.9	VMAT+3D			91	VMAT+3D
